# Supplementary material
Source: Research Square preprint supplement (doi:10.21203/rs.3.rs-9719623/v1)
Supplement: Supplementary file 1 [file 5bac046f1f0c99d1dbd0d55d.docx]

Supplementary information

**Topography, microclimate and fine-scale thermal heterogeneity modulate pollinator foraging behavior**

Elena Kaminskaia* and Nicole E. Rafferty

School of BioSciences, The University of Melbourne, Parkville, Victoria 3010, Australia

*To whom correspondence may be addressed. Email: ekaminskaia@student.unimelb.edu.au

Table S1. List of all flower species recorded through flower surveys conducted at each site.

| **Family** | **Genus** | **Species** | **Pollinator interaction observed** |
| --- | --- | --- | --- |
| Brassicaceae | Raphanus | Raphanus raphanistrum | Yes |
| Brassicaceae | Hirschfeldia | Hirschfeldia incana | Yes |
| Asteraceae | Bellis | unknown | No |
| Brassicaceae | Capsella | Capsella bursa-pastoris | Yes |
| Asteraceae | Taraxacum | unknown | Yes |
| Papaveraceae | Fumaria | Fumaria muralis | Yes |
| Geraniaceae | Erodium | Erodium moschatum | Yes |
| Caryophyllaceae | Cerastium | Cerastium glomeratum | No |
| Fabaceae | Trifolium | Trifolium subterraneum | Yes |
| Primulaceae | Lysimachia | Lysimachia arvensis | No |
| Asteraceae | Arctotheca | Arctotheca calendula | Yes |
| Fabaceae | Trifolium | unknown | Yes |
| Ranunculaceae | Ranunculus | unknown | Yes |
| Violaceae | Viola | Viola arvensis | No |
| Asteraceae | Leucanthemum | unknown | Yes |

Table S2. Coefficients for visitation rate pSEM. Significance codes: <0.001 '***' <0.01 '**' <0.05 '*'

| Response | Predictor | Estimate | Std.Error | DF | Crit.Value | P.Value | Std.Estimate |  |
| --- | --- | --- | --- | --- | --- | --- | --- | --- |
| log_vis_rate | SHDI_TIR | -0.306 | 0.116 | 122 | -2.648 | 0.008 | -0.269 | ** |
| log_vis_rate | iTemp_value | 0.070 | 0.019 | 122 | 3.616 | <0.001 | 0.317 | *** |
| log_vis_rate | GTI | 0.001 | <0.001 | 122 | 3.451 | <0.001 | 0.350 | *** |
| log_vis_rate | elevation | -0.003 | 0.001 | 122 | -3.411 | <0.001 | -0.383 | *** |
| log_vis_rate | TPI_scaled | 0.173 | 0.057 | 122 | 3.047 | 0.002 | 0.266 | ** |
| iTemp_value | rh | -0.102 | 0.012 | 122 | -8.245 | <0.001 | -0.429 | *** |
| iTemp_value | GTI | 0.004 | 0.001 | 122 | 3.599 | <0.001 | 0.255 | *** |
| iTemp_value | elevation | 0.019 | 0.008 | 122 | 2.372 | 0.018 | 0.473 | * |
| iTemp_value | avg_wind_speed | -1.402 | 0.332 | 122 | -4.228 | <0.001 | -0.541 | *** |
| iTemp_value | eastness | 3.423 | 1.268 | 122 | 2.699 | 0.007 | 0.593 | ** |
| SHDI_TIR | iTemp_value | -0.091 | 0.015 | 122 | -6.209 | <0.001 | -0.458 | *** |
| SHDI_TIR | GTI | 0.001 | 0.000 | 122 | 10.993 | <0.001 | 0.457 | *** |
| SHDI_TIR | rh | -0.011 | 0.003 | 122 | -4.186 | <0.001 | -0.232 | *** |
| SHDI_TIR | TPI_scaled | -0.230 | 0.080 | 122 | -2.871 | 0.004 | -0.412 | ** |
| SHDI_TIR | elevation | 0.003 | 0.001 | 122 | 2.171 | 0.030 | 0.332 | * |
| SHDI_TIR | eastness | 0.478 | 0.194 | 122 | 2.466 | 0.014 | 0.417 | * |

Table S3. Coefficients for handling time pSEM. Significance codes: <0.001 '***' <0.01 '**' <0.05 '*'

| Response | Predictor | Estimate | Std.Error | DF | Crit.Value | P.Value | Std.Estimate |  |
| --- | --- | --- | --- | --- | --- | --- | --- | --- |
| log_duration | SHDI_TIR | 0.505 | 0.182 | 122 | 2.776 | 0.006 | 0.277 | ** |
| log_duration | iTemp_value | -0.113 | 0.030 | 122 | -3.702 | <0.001 | -0.317 | *** |
| log_duration | GTI | -0.002 | 0.001 | 122 | -3.338 | 0.001 | -0.342 | *** |
| log_duration | elevation | 0.005 | 0.001 | 122 | 3.404 | 0.001 | 0.373 | *** |
| log_duration | TPI_scaled | -0.236 | 0.090 | 122 | -2.629 | 0.009 | -0.226 | ** |
| iTemp_value | rh | -0.102 | 0.012 | 122 | -8.245 | <0.001 | -0.429 | *** |
| iTemp_value | GTI | 0.004 | 0.001 | 122 | 3.599 | <0.001 | 0.255 | *** |
| iTemp_value | elevation | 0.019 | 0.008 | 122 | 2.372 | 0.018 | 0.473 | * |
| iTemp_value | avg_wind_speed | -1.402 | 0.332 | 122 | -4.228 | <0.001 | -0.541 | *** |
| iTemp_value | eastness | 3.423 | 1.268 | 122 | 2.699 | 0.007 | 0.593 | ** |
| SHDI_TIR | iTemp_value | -0.091 | 0.015 | 122 | -6.209 | <0.001 | -0.458 | *** |
| SHDI_TIR | GTI | 0.001 | <0.001 | 122 | 10.993 | <0.001 | 0.457 | *** |
| SHDI_TIR | rh | -0.011 | 0.003 | 122 | -4.186 | <0.001 | -0.232 | *** |
| SHDI_TIR | TPI_scaled | -0.230 | 0.080 | 122 | -2.871 | 0.004 | -0.412 | ** |
| SHDI_TIR | elevation | 0.003 | 0.001 | 122 | 2.171 | 0.030 | 0.332 | * |
| SHDI_TIR | eastness | 0.478 | 0.194 | 122 | 2.466 | 0.014 | 0.417 | * |

Key:

| Code | Description |
| --- | --- |
| log_vis_rate | log+1 transformed visitation rate |
| iTemp_value | Air temperature data obtained from iButton data loggers |
| SHDI_TIR | thermal heterogeneity of the flower patch surface |
| GTI | Global tilted irradiance |
| elevation | Elevation (m) |
| avg_wind_speed | Average wind speed (miles/hour) |
| eastness | Aspect values converted into “eastness” through cos transformation |

Table S4. Model coefficients obtained from GLMM with Gaussian distribution on pollinator operative body temperature (Te) when foraging on the flower in relation to air temperature, solar radiation (scaled and centered), elevation and wind speed.

|  | Estimate | Std. Error | z value | Pr(>|z|) |
| --- | --- | --- | --- | --- |
| (Intercept) | 25.289 | 3.006 | 8.413 | 0.000 |
| iTemp_value | 0.265 | 0.107 | 2.471 | 0.013 |
| GTI_scaled | 1.411 | 0.271 | 5.216 | <0.001 |
| elevation | -0.030 | 0.005 | -5.550 | <0.001 |
| avg_wind_speed | 0.624 | 0.348 | 1.790 | 0.073 |

Table S5. Model coefficients obtained from GLMM with Gaussian distribution on visitation rate (log+1 transformed) in relation to pollinator operative body temperature (Te) on a flower.

|  | Estimate | Std. Error | z value | Pr(>|z|) |
| --- | --- | --- | --- | --- |
| (Intercept) | 0.229 | 0.584 | 0.393 | 0.695 |
| Te_flower | 0.044 | 0.019 | 2.315 | 0.021 |

Table S6. Model coefficients obtained from LMM on visitation rate (log+1 transformed) in relation to thermal heterogeneity, air temperature, solar radiation, elevation and TPI (scaled and centered around the mean).

|  | Estimate | Std. Error | z value | Pr(>|z|) |
| --- | --- | --- | --- | --- |
| (Intercept) | -0.434 | 0.559 | -0.778 | 0.437 |
| SHDI_TIR | -0.311 | 0.117 | -2.659 | 0.008 |
| iTemp_value | 0.073 | 0.019 | 3.825 | <0.001 |
| GTI | 0.001 | <0.001 | 3.643 | <0.001 |
| elevation | -0.003 | 0.001 | -4.159 | <0.001 |
| TPI_scaled | 0.172 | 0.057 | 2.995 | 0.003 |

Table S7. Model coefficients obtained from LMM on handling time (log+1 transformed) in relation to thermal heterogeneity, air temperature, solar radiation, elevation and TPI (scaled and centered around the mean).

|  | Estimate | Std. Error | z value | Pr(>|z|) |
| --- | --- | --- | --- | --- |
| (Intercept) | 6.850 | 0.880 | 7.785 | <0.001 |
| SHDI_TIR | 0.514 | 0.183 | 2.809 | 0.005 |
| iTemp_value | -0.117 | 0.030 | -3.878 | <0.001 |
| GTI | -0.002 | 0.001 | -3.549 | <0.001 |
| elevation | 0.005 | 0.001 | 4.135 | <0.001 |
| TPI_scaled | -0.234 | 0.090 | -2.585 | 0.010 |

Table S8. Model coefficients obtained from LMM on air temperature in relation to relative humidity, solar radiation, elevation, wind speed, and aspect (“eastness”).

|  | Estimate | Std. Error | z value | Pr(>|z|) |
| --- | --- | --- | --- | --- |
| (Intercept) | 26.794 | 1.591 | 16.841 | <0.001 |
| rh | -0.102 | 0.012 | -8.245 | <0.001 |
| GTI | 0.004 | 0.001 | 3.599 | <0.001 |
| elevation | 0.019 | 0.008 | 2.372 | 0.018 |
| avg_wind_speed | -1.402 | 0.332 | -4.228 | <0.001 |
| eastness | 3.423 | 1.268 | 2.699 | 0.007 |

Table S9. Model coefficients obtained from LMM on thermal heterogeneity in relation to air temperature, solar radiation, relative humidity, TPI (scaled and centered around the mean), elevation and aspect (“eastness”).

|  | Estimate | Std. Error | z value | Pr(>|z|) |
| --- | --- | --- | --- | --- |
| (Intercept) | 3.225 | 0.485 | 6.646 | <0.001 |
| iTemp_value | -0.091 | 0.015 | -6.209 | <0.001 |
| GTI | 0.001 | <0.001 | 10.992 | <0.001 |
| rh | -0.011 | 0.003 | -4.186 | <0.001 |
| TPI_scaled | -0.230 | 0.080 | -2.871 | 0.004 |
| elevation | 0.003 | 0.001 | 2.170 | 0.030 |
| eastness | 0.478 | 0.194 | 2.466 | 0.014 |

**
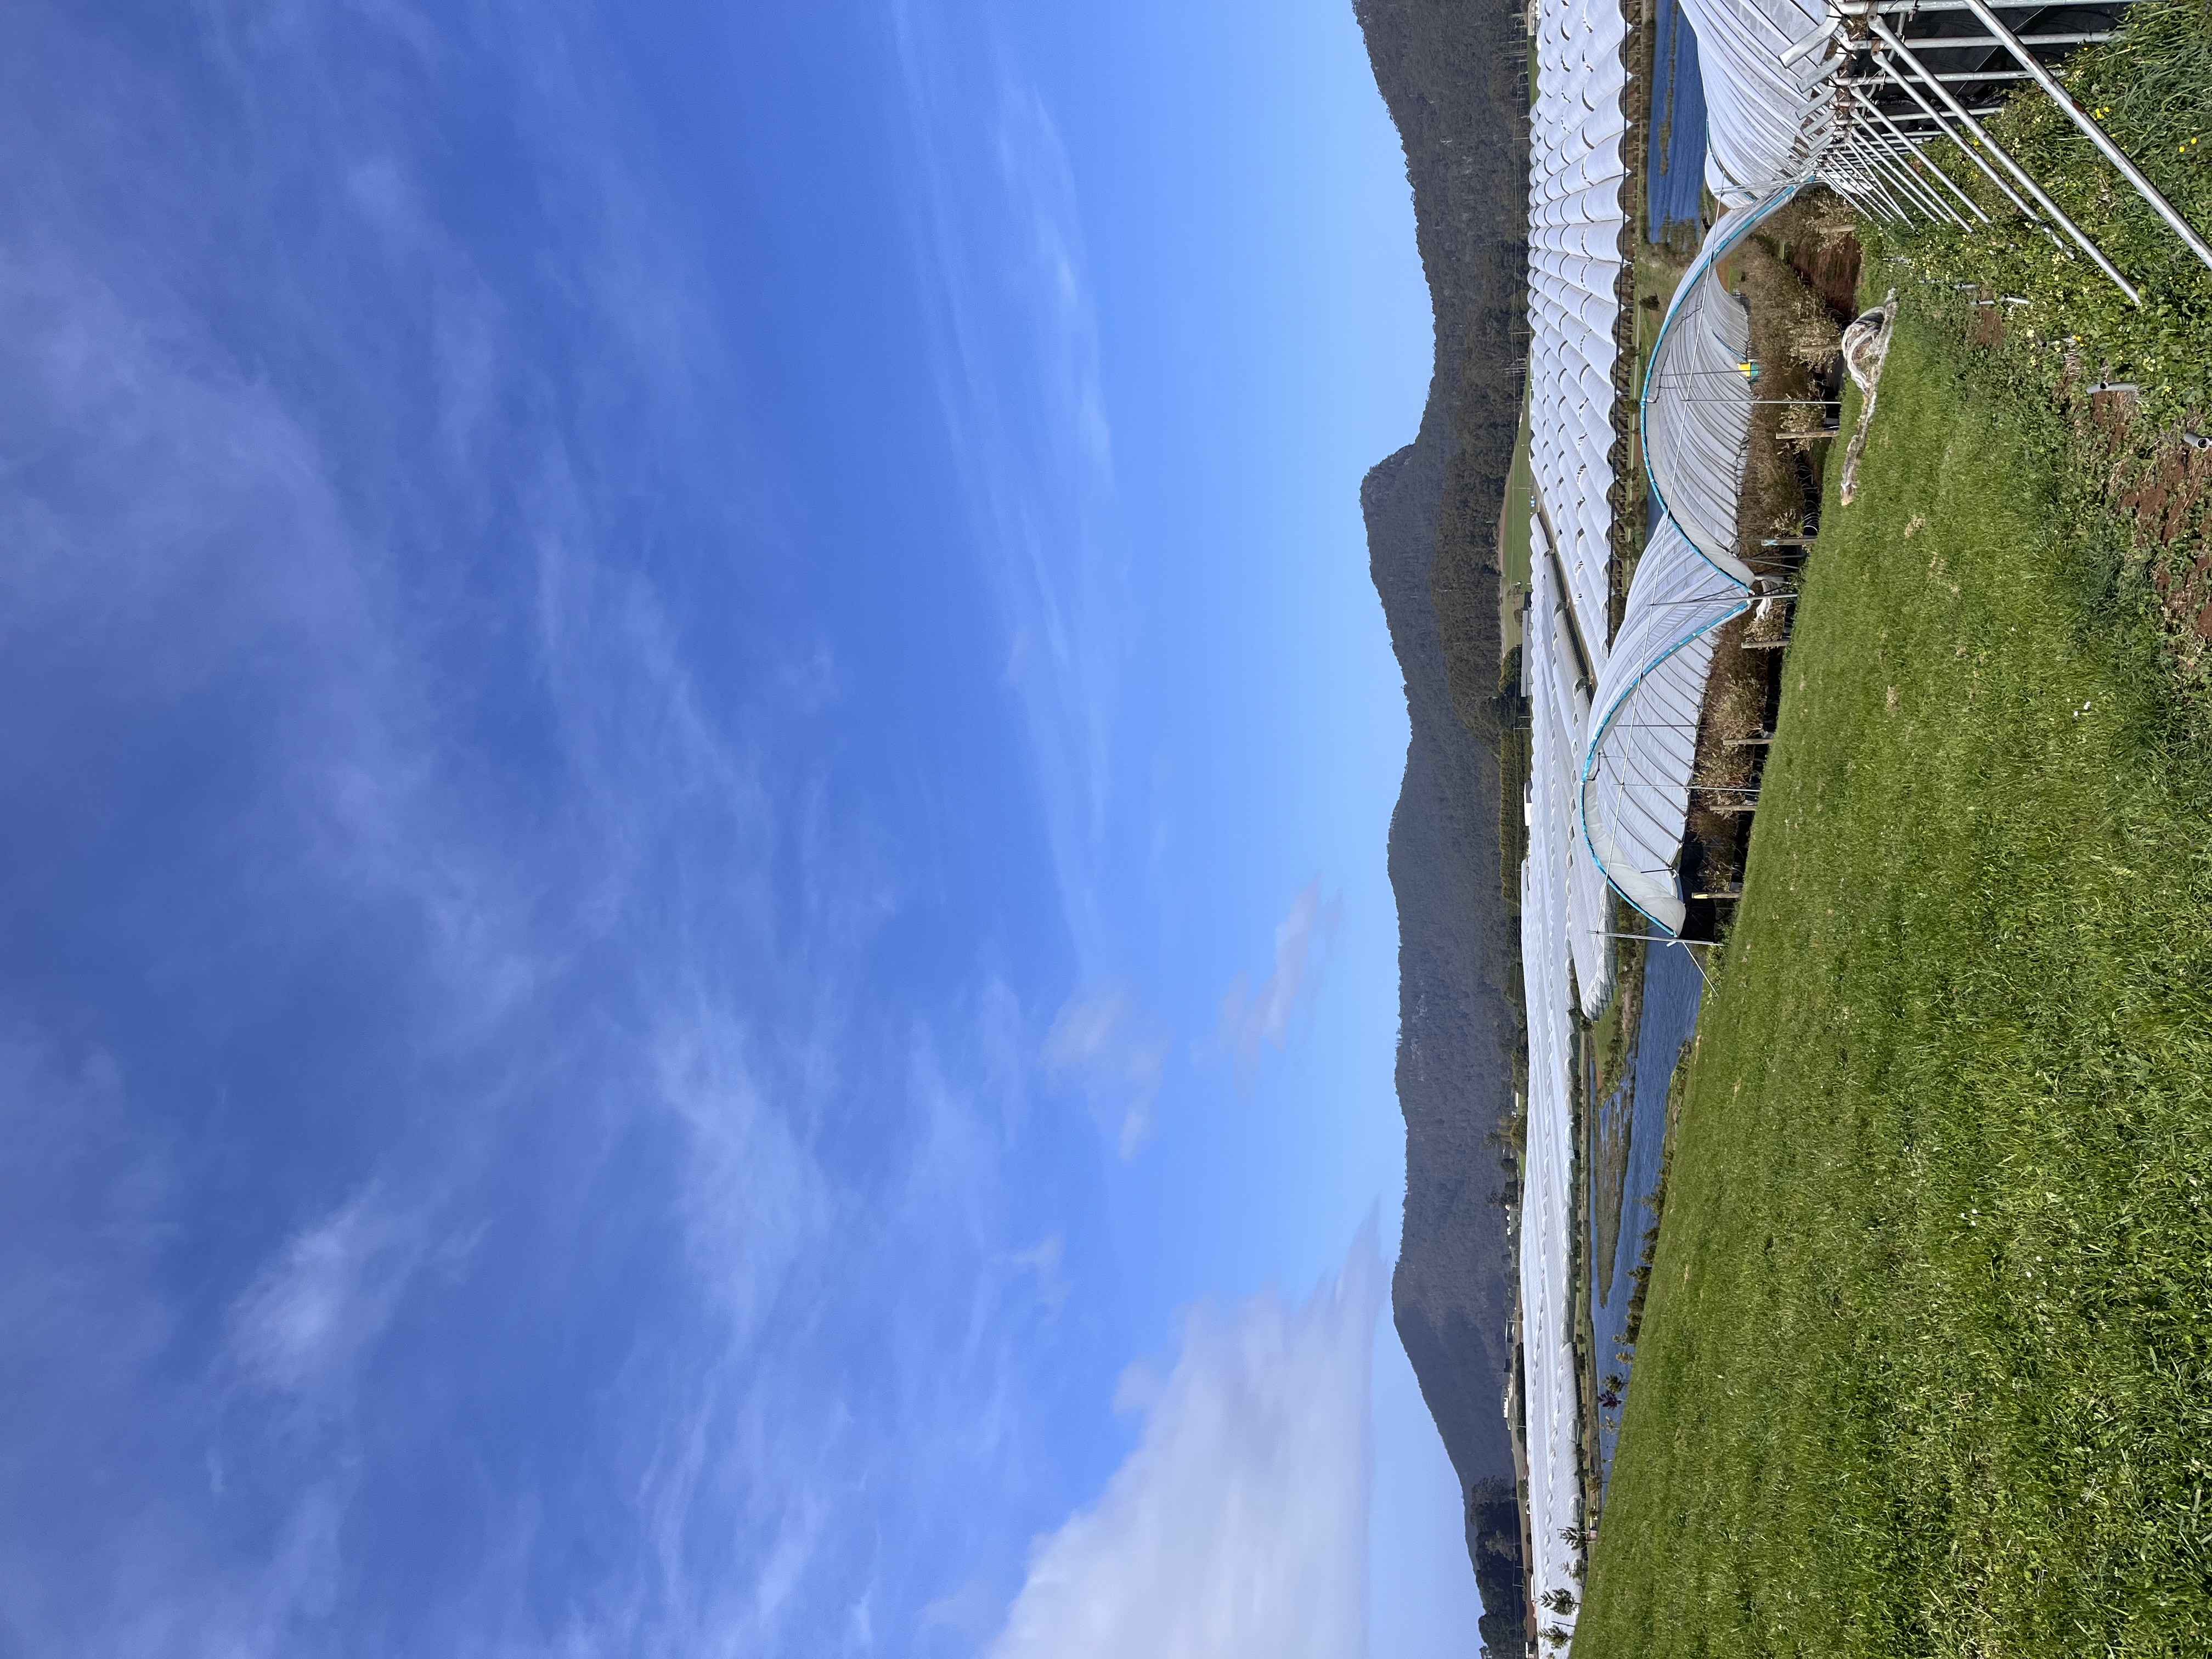

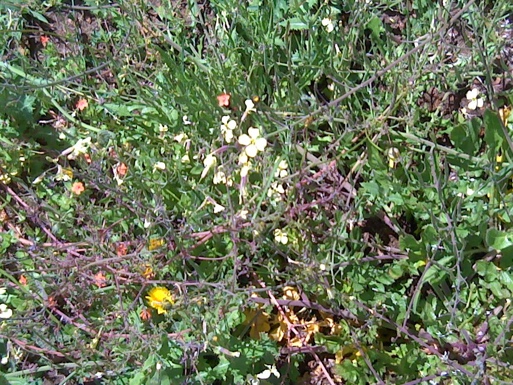

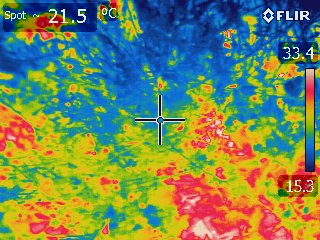
**

(b)

**Fig. S1** (a) Landscape surrounding Westerway Raspberry Farm study site and (b) an example of a regular photograph (top) of a flower patch and an infrared version of the photograph (bottom), used to quantify thermal heterogeneity of the flower patch surface.

(a)
